# Supplementary material for: GPR126 is a specifier of blood-brain barrier formation in the mouse central nervous system
Source: PubMed Central journal article supplement (PMC11290973; doi:10.1172/jci165368), 2024-06-06
Supplement: jci-134-165368-s058.pdf [file jci-134-165368-s058.pdf]

**Full unedited gel for Figure 1F**

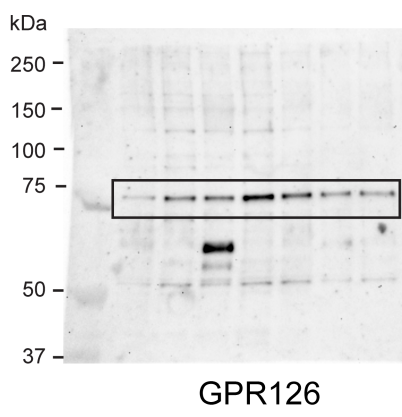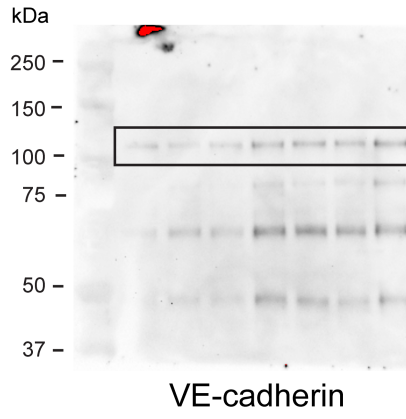

**Full unedited gel for Figure 5E**

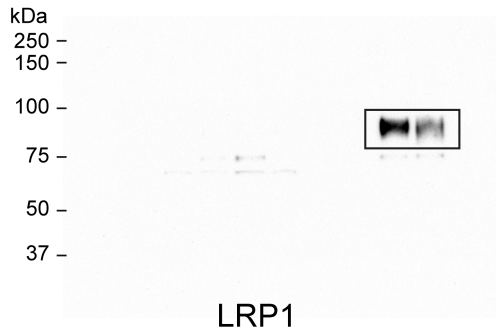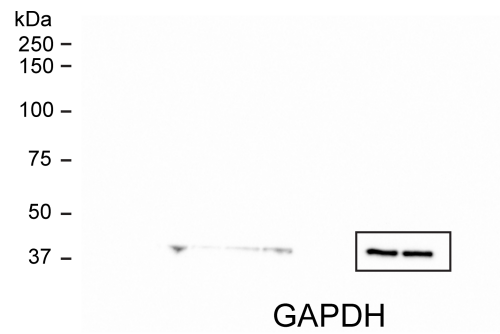

**Full unedited gel for Figure 5I**

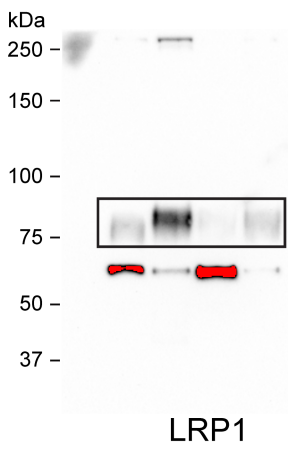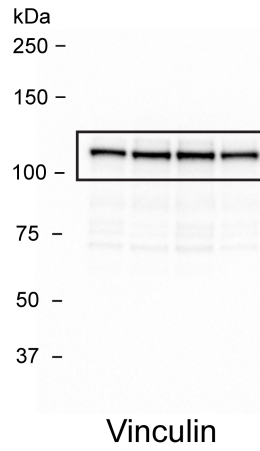

**Full unedited gel for Figure 5K**

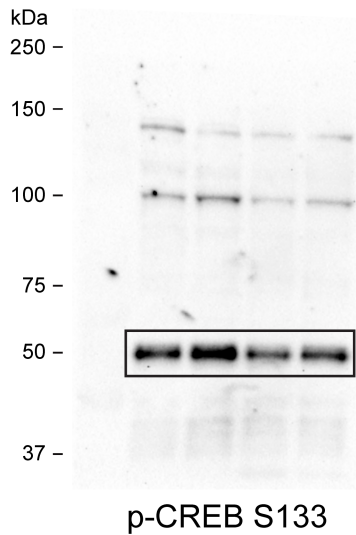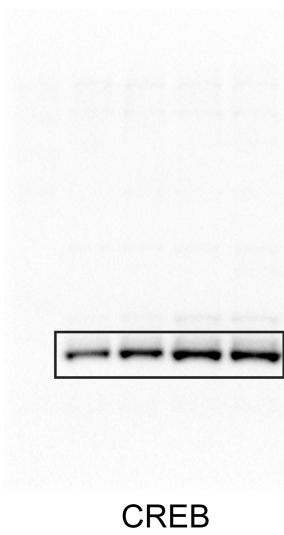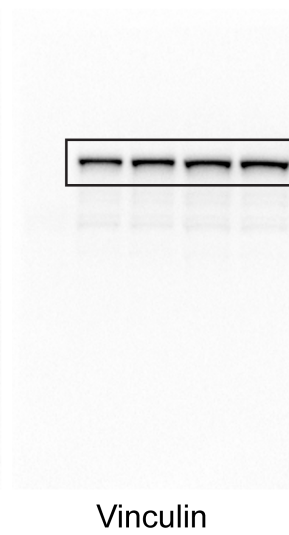

**Full unedited gel for Figure 5M**

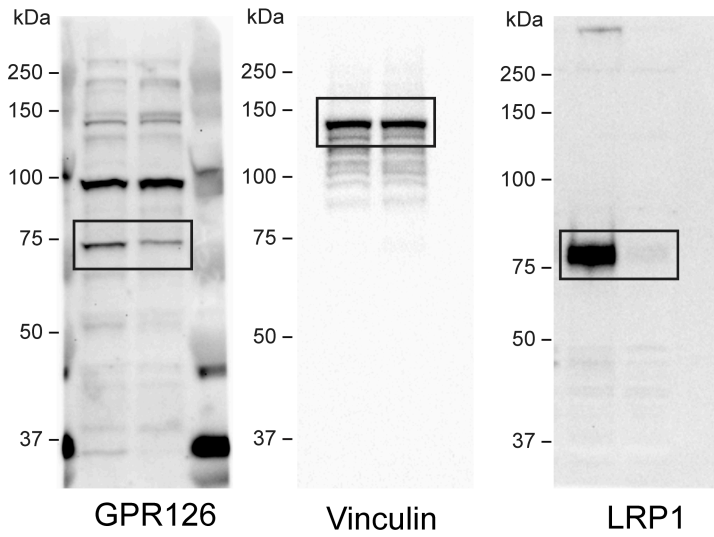

**Full unedited gel for Figure 6D**

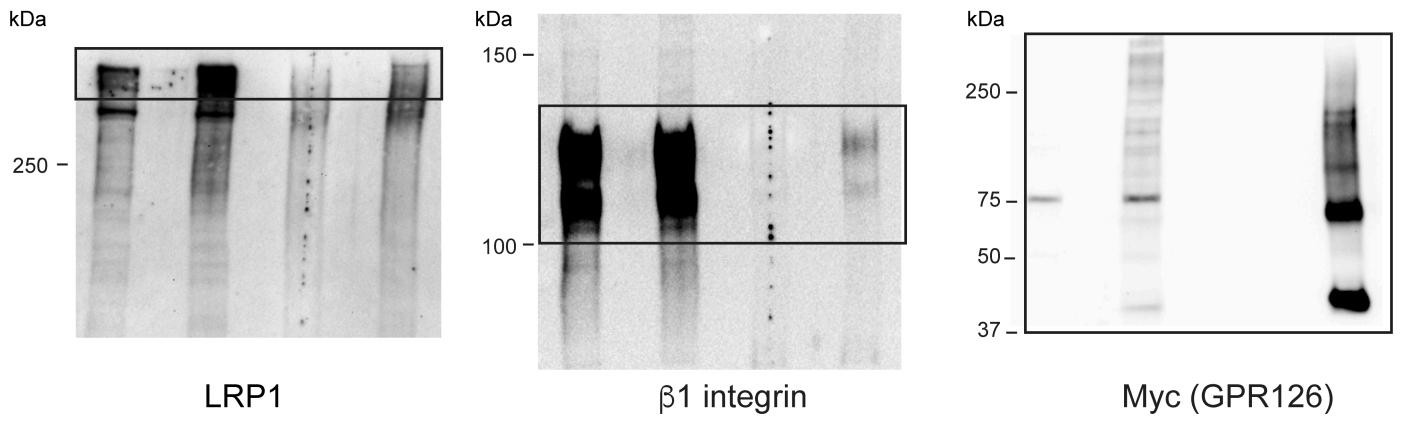

**Full unedited gel for Figure 6E**

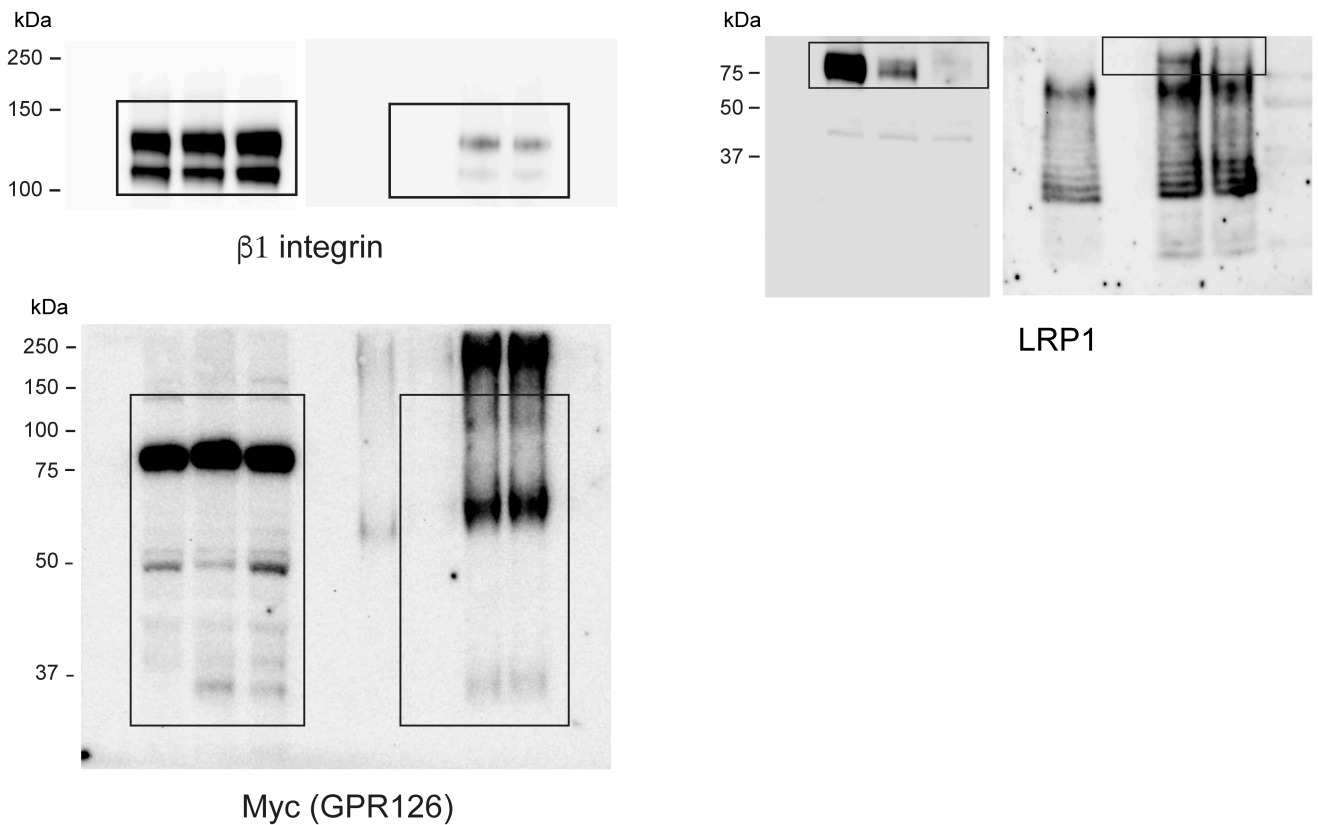

**Full unedited gel for Supplementary Figure 9C**

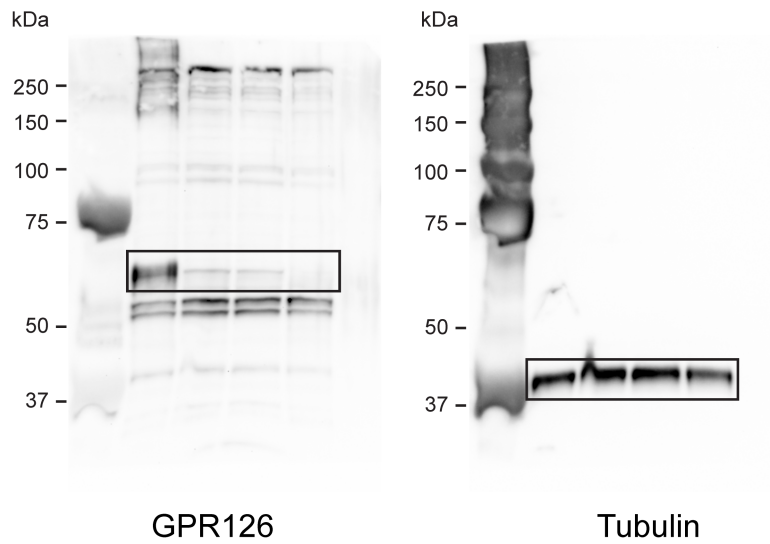

**Full unedited gel for Supplementary Figure 10B**

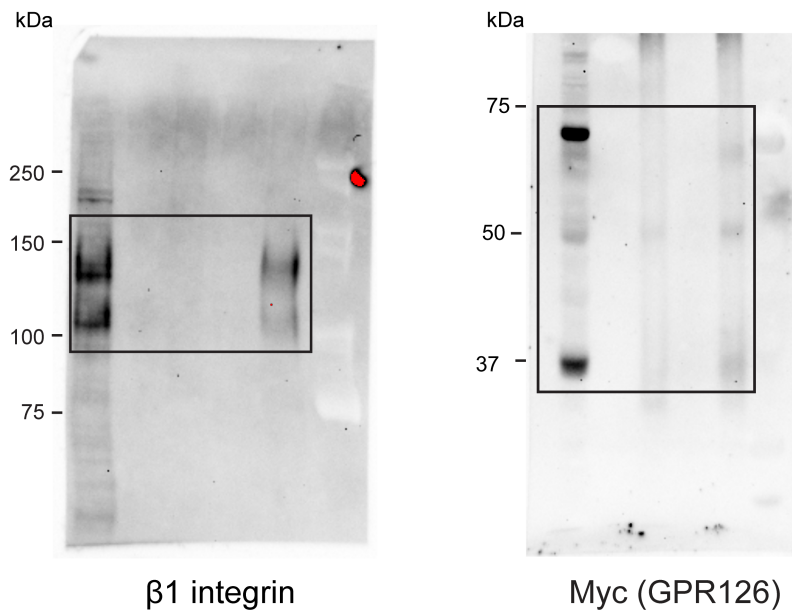

**Full unedited gel for Supplementary Figure 10D**

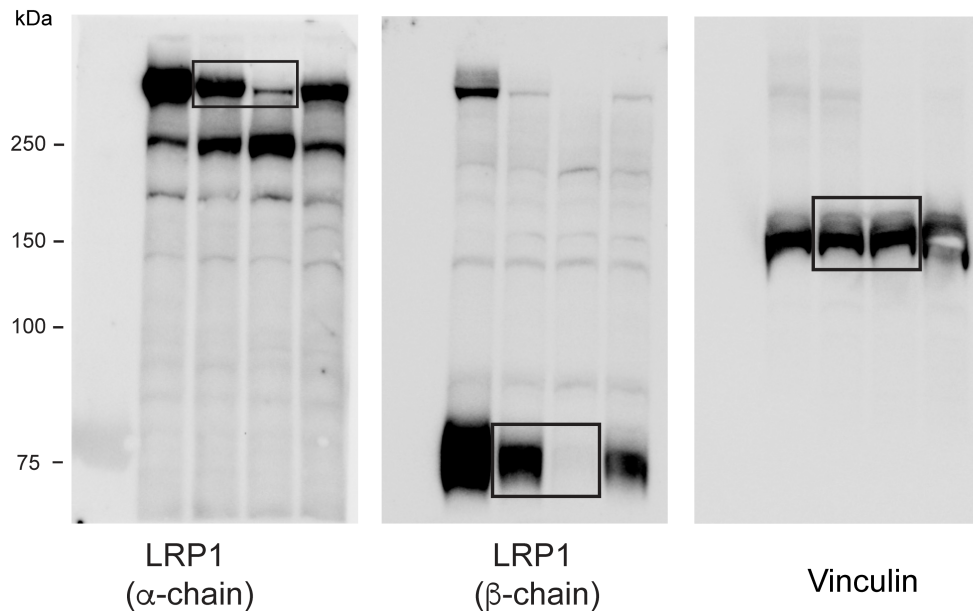

Full unedited gel for Supplementary Figure 10K

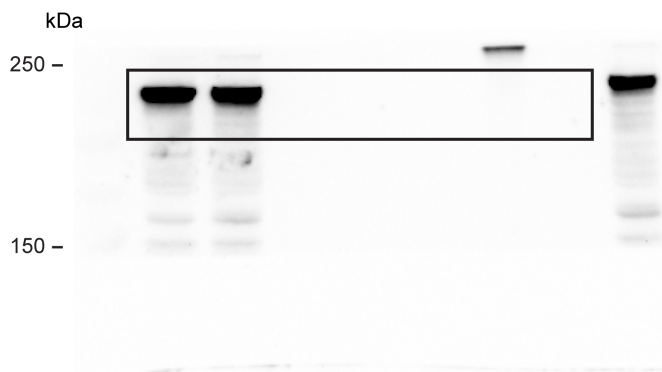

$\alpha 1$  integrin

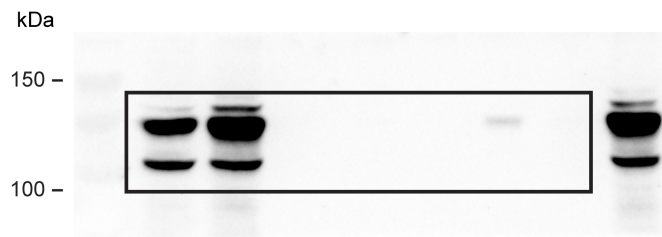

$\alpha 3$  integrin

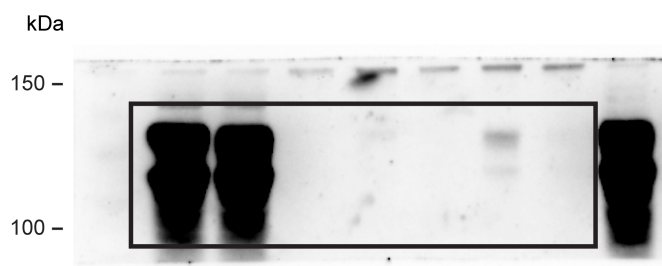

$\beta 1$  integrin

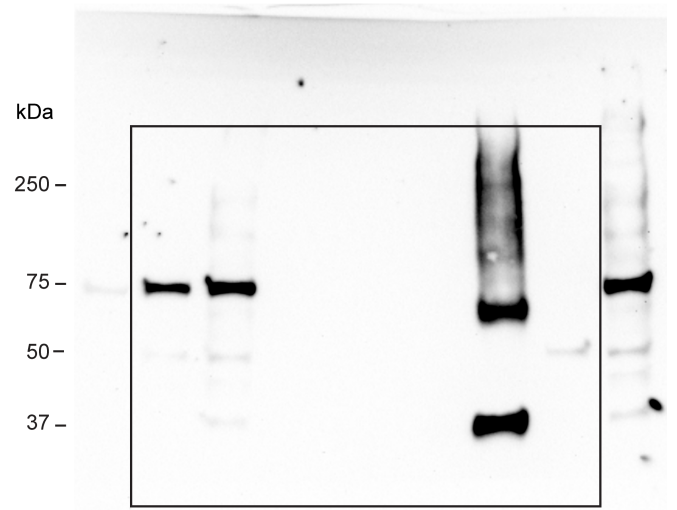

Myc (GPR126)
